# Supplementary material for: Cyanidin 3-O-galactoside: A Natural Compound with Multiple Health Benefits
Source: PubMed Central journal article supplement (PMC7956414; doi:10.3390/ijms22052261), 2021-02-24
Supplement: ijms-22-02261-s001.pdf [file ijms-22-02261-s001.pdf]

A.chinensis .....  
 A.cordata .....  
 A.graveolens .....  
 D.carota .....  
 M.domestica ATTAGCCTTGTAAGCTGTAATGGCAGCGCCGCTGCCCATCGAAATCGAACCATCATCAAC  
 P.hybrida .....  
 V.mungo .....

A.chinensis .....  
 A.cordata .....  
 A.graveolens .....  
 D.carota .....  
 M.domestica TAATGGTCAACCCCATCTCGCCGACGCCTACAACCGTCACGTGGCTGTCTGTAGCCTTCCC  
 P.hybrida .....  
 V.mungo .....

A.chinensis .....  
 A.cordata .....  
 A.graveolens .....  
 D.carota .....  
 M.domestica TTTCACTAGCCATGCAAGCGCCTTGCTTGAGACCGTGCGCCGCCTAGCCACCGCCCTTCC  
 P.hybrida .....  
 V.mungo .....

A.chinensis .....  
 A.cordata .....  
 A.graveolens .....  
 D.carota .....  
 M.domestica AAACACTCTCTTCTCGTCTTTCAGCACTTCAAATCCAACAGCTCTCTCTTTTCCAACAA  
 P.hybrida .....  
 V.mungo ..... AAT

A.chinensis .....  
 A.cordata ATTATATCCCTTATTTATTCATAAGTTAATTCAACTGTGCTAGTTACCTATCTCTCTTC  
 A.graveolens .....  
 D.carota .....  
 M.domestica CAGCATTGATAACATGCCGCGTAACATAAGGGTGTACGATGTGGCTGACGGGGTGCCGGA  
 P.hybrida .....  
 V.mungo TCGGCACGAGTATTGGTGGAATCAAGAATGTATATATTTAAGTGTGAACAGAGCTACTAA

A.chinensis .....  
 A.cordata TGAATTCGAGAATTAATCAGCAGGTGGAATAATTAATTATTAATGTTACCAATCTCATC  
 A.graveolens .....  
 D.carota .....  
 M.domestica GGGGTACGTTTTCTGGGCAAGCCGAGGAGACATAGAGCTCTTCAATGAAATGCGCACC  
 P.hybrida .....  
 V.mungo ACTCCATTGCTCTCATTTTTCTCAGATCAAGGCACAGCAAAATCATGGGAATTCAGAGA

A.chinensis TGAATGC CACGTGGCGGTGCTCGCATTCCTCCGTTTCCACGCAC ..... CCGGC C C C T  
 A.cordata GGAGCCA CATGTGGGGTCTTIGCCTTCCCATTTGCTACACAC ..... GC CGGTCTCCCT  
 A.graveolens GGAACCC CATGTAGCGGTCTTIGTTTTTCCGTTTGGCTACGCAC ..... GTGGTCTCCT  
 D.carota GGAACCC CATGTAGCGGTCTTIGTTTTTCCATTTGGCTACGCAC ..... GCTGGTCTGCT  
 M.domestica GGA . AA CATCCGGAAGAGCTTAGACGCTTCCGTTGGCGGA CATCGGGAAGCAGATCAGCTT  
 P.hybrida CAATTACCATGTTGCTGTTCTAGCATTCCCTTTTGCAACACAT ..... GCTGGCTTTT  
 V.mungo GAA GAAA CATGTTGCAGTGT TTTCTTCCCTTTGGAGGCAC ..... CTACTCCTCT

80 90 100 110 120  
A.chinensis CC T C A A G C C . . . . . T G T C C A A C G G C T G G C G G T . C G A G G C C C T G A C G T G A  
A.cordata CC T T G G C C C . . . . . T A G T C C G T A G G C T A G C C G C . C G C T G C C C T A A C G T C A  
A.graveolens CT T T G G C C C . . . . . T C G T A C A A C G G T T G G C C A G . G G C T G C T C C A A A T G T G A  
D.carota CT T T G G C C C . . . . . T C G T G C A G C G T C T G C T A A . G G C T G C A C C G A A T G T C A  
M.domestica GC T T G A T C A C C G A C G C C T T C C T T G G T T T G G A G T C C A C T T G G C T G A C G A G T T G G G A G T G A  
P.hybrida AC T T G G A C . . . . . T G T A C A A A G G C T A G C A A A . T G C A T T A C C T A A C G T G A  
V.mungo GT T A A A G C . . . . . T G G T G C T G A A G C T G A C C A A . T G C T G C T C C A A C T G C

130 140 150 160 170  
A.chinensis TC T T C . T C T T C A T T A G C A C G G C C A A G T C G A A G A G T C C T T . . . G T T C A G T G C C A A A .  
A.cordata AT T T C . T C T T C T A T A G C A C C G C T G C A T C C A A G C G T T C A T T . . . A T T T C A T A T C C A A A T  
A.graveolens AG T T C . A C A T T T T A A C A C A G C C A A G T C T A A G C A C A C A T T . . . G T T T C A G A T T A T A T C A  
D.carota AG T T C . A C A T T T T T A A C A C G C C A A G T C G A A C C A T T C G T C . . . G T T T C A A A T T C A T C A  
M.domestica CT T G G G T C A C T T T C T G G A T C T C C G G A C T C A A T C C C T C C C G . T T C A T G T G C A T A C T G A T  
P.hybrida CA T T T . A C A T T C T T T A A C A C G T C C A A A T C A A A T T C T T C A T T . . . A T T C A C T A C T C C T C A .  
V.mungo AA T T C . T C A T T C A T A G G C A C G A A C A C T C A A G A A A T C T C T T C T G A T C T C A A G C C C A .

180 190 200 210 220 230  
A.chinensis . . . . . C C C T G A G A A C A T A A A G C C T T A C C C C G T T T G G A C G G C G T T C C A G A G G G A T A C G T G  
A.cordata T C T C C T T A T T C T A A T G T A T A C C C T A C G A T G T C T C C G A T G G C G T A C A G A G G G C T A C G T G  
A.graveolens A C T G T T G C T A G T A A T A T A C C A T T T G A T G T T T A T G A T G G C G T G G A G C C C G G A T A T G T G  
D.carota A G C A T T G C T A G C A A T G T A T A C C T T A T G A T G T C T A T G A T G G C G T G G A G A G G G G A T A T G T G  
M.domestica C T C A T C C C G A C A C T A T T G G A A C T C A A G G T G C G T A C G T T A T A C T T A C A C T T A C T T A C C T  
P.hybrida . . . . . T G A C A A C A A C A T T A A A C C G T T T A A T A T C C C G A T G G C G T C C C G G A G G G T A C G T G  
V.mungo . . . C A T C C C A G A C A C C A T C A A G T T T A C A G T A T A A G C G A T A T A A G C G A T G G A G T C C A G A G G T A . T G

240 250 260 270 280  
A.chinensis T T C G C G G . . G G A A G C C C . A G G A A G A C A T T A A C T T G T T C C T T A A G G T G G C G G C A A G G G C  
A.cordata T T T C C G . . G G A A G C C A C . A A G A G A T A T T A A C T T G T T C T T G A C C G T T G C C C C A G A T G A  
A.graveolens T T C T C T G . . G G A A A C C T C . A A G A G A T A T T A G C T T G T T C T T G G C T G T G C G A G A T A G  
D.carota T T C T C G G . . G G A A G C C A C . A A G A G A T A T C A A C T T G T T C C T G G C T G T G C A C G G A T A G  
M.domestica G T C T T T A A . A G T T G A A G C A T T G A G A A T C C T T G T T C G T T T G G T A G T A C T T A C G A A A A G C  
P.hybrida G T C G G A A A A G G A G G T A T T G A A G C C T T A T A G G T T G T T C T T T A A G T C T G C T A A A A G A A T  
V.mungo T T C C A G G T . G G C A T C A G T C G A A A G A G T C A A C C T T T T C T T C A G C T T C T C T C A G A A C

290 300 310 320 330 340  
A.chinensis . . . . . T T T A A G T T G G C G A T G C A G G C G T T G A A G T A G A G A C A G G C G G A G A G A A G C T G  
A.cordata . . . . . T T T A A G A G A G G C T T G G A A A A A G C C C G G T G A C T C C G G T A G G A A G A T C A C C T G  
A.graveolens . . . . . T T C C G G C G A G G T G T G G A A A A G C A G C T G C G G A T T C T G G T A G C A A G A T C A C T T G  
D.carota . . . . . T T T C G A C G A G G C T T G G A A A A G C A G T T G T G A T T C T G G T A G C A G A T C A G T T G  
M.domestica A T T T T T C T T T C A A G T G T T T A T T G G A A A A G C A C T T T C C A G T C A C A A A T A G G T G C T C A C T T  
P.hybrida . . . . . A T T C A A A A T G C T A T G G C A G C T G C T G G A G A A T C G G G A A A G A A G A T T A C T T G  
V.mungo . . . . . T G C A A A A G G A A T A G A C A T G C A G T G C A G T G C T C A C A C A A A G A G A G A T A C T T G

350 360 370 380 390 400  
A.chinensis G G T G A T G G G G A C G C C T T T T G T G G T T T T C T A G C G A C A T G G C G G A G G A G A G G G C A T C C C  
A.cordata T T T G G T G G G G A C G C T T T T T A T G G T T T T C C G G C G A T T T G G C C G A A C A A A T T C G T G T G C C  
A.graveolens T T T G G T T G G G A C G C T T T T T G T G G T T T C T T G T G A T T G G C A C A A G A G A T T G G T T G C C  
D.carota T T T A G T T G C A G A T G C A T T T T T G T G G T T T C T T G T G A T T T G C A C A A G A G A T T G G T T G C C  
M.domestica T T C C T T T T A A A T A T T C T C T . . . . . C A T T T A T C A A C A T . A C A T A A T G G T T A T T T A T A C  
P.hybrida T G T T A T G C A G A T G C A T T A T G T G G T T T T C T G G T G A G A T G C T G A G A A T T G A G C C T T G G  
V.mungo T G T C A T C T G A T G C T T T G T C G C A C C T T C T C T C A C T G T G G C T A G C C T T G A C C T T C C

410 420 430 440 450 460  
A.chinensis G T G G G T G C A A T T T G G A T G T C A G G G G C G T G C T C T T G T C G G T A C A T T T G T A C A C T G A C C T  
A.cordata A T G G G T C C A C T T T T G G A C T C C G G A G C T T G C T G C T T T C G A T C C A C G T T T A C A C C G A T C T  
A.graveolens A T G G G T G C A C T T T T G G A C T C C G G G C T T G C T C T T T C A A C T C A C A T T T A C T G A T C T  
D.carota A T G G G T G C A C T T T T G G A C T C C G G G C T T G C T C T T T C A A C T C A C A T T T A C T G A T C T  
M.domestica T T G G A T T T C A A G T T T T A A G T A T C A A T G A T T C A A T T T T A G G T T T T A G T A T C A . . A A T T T  
P.hybrida T T G G A T C C C T T T T T G G A C T T C T G C T G C T G G A T C A C T C T C T G T T C A T G T T T A C A C T G A C T T  
V.mungo A T G G G T T C G G T T T T G G C C T C C T T T G T C A T G C A C T C T C T G C G C A T T T T T A C A C T G A A T T

|               | 470              | 480          | 490       | 500         | 510         | 520         |
|---------------|------------------|--------------|-----------|-------------|-------------|-------------|
| A. chinensis  | TATTAAGGAAACAGT  | TAGGATTTAGT  | GAATTCT   | GGACGCCAAAC | GAAC        | TCTTGAAATT  |
| A. cordata    | TATCAAGCAAACTGT  | TGGACTTGGT   | GGTATTGAA | GGACGTATG   | GATGAGATTC  | TGACGTT     |
| A. graveolens | TATTCGCCAAACTGT  | TGGACTAGAA   | GGTGTAGAA | GGACGTATG   | GATGAAAAGC  | TAAACTTT    |
| D. carota     | TATTAGGCCAAACTGT | TGGATTTGAT   | GAATTGAA  | GGACGTATG   | GATGAGAAAGC | TGAACTTT    |
| M. domestica  | TGTGCATTTCAGGCA  | TACAGGTCGT   | GAAACGAC  | CTCATCGTC   | GACAAAATG   | TAA...      |
| P. hybrida    | CATTAGAGAAATGT   | TGAGGCTCAA   | GAATTGCT  | GGACGTGAA   | GATGAAATTC  | TAAACTTT    |
| V. mungo      | GATACGCCAAAC     | GTGTAACTCTGC | AGCA...   | .....       | GGAACACC    | CCCTTGGAATT |

|               | 530               | 540          | 550          | 560           | 570           |
|---------------|-------------------|--------------|--------------|---------------|---------------|
| A. chinensis  | CATTCACAGGATTTTC  | CGAGCTGGCC   | TGGTGACTTGC  | CAGTGGAGTCT   | TGC.....T     |
| A. cordata    | CATTCACCGATTTTTC  | TGAATTAGCGGC | TGGTGACTTACC | CGGTGGAGTCC   | TTT.....T     |
| A. graveolens | CATTCCTGGATTTTTC  | TGAACATAAGAT | TAGGTGACTTGC | TGGTGGAGTGG   | TGT.....T     |
| D. carota     | CATTCCTGGATTTTTC  | TAAATTAAGGC  | TAGGTGACTTGC | TGGTGGAGTGG   | TGT.....T     |
| M. domestica  | CATTCACAGGCTCTCTC | CAATGTAGCAA  | TCAAAGACTT   | AGCGAAGGAGT   | CACTT.....T   |
| P. hybrida    | CATTCACAGGATTTTTC | CGAATTAGCGGC | TAGGTAGT     | TGGCTAGTGGAGT | TGTCT.....C   |
| V. mungo      | TGTTCCCTGGATTGTC  | TAGAATGGCAGT | TGAAGACTTGC  | AGAAAGATCT    | GATTCCAAGGTGC |

|               | 580              | 590     | 600        | 610     | 620      | 630           |
|---------------|------------------|---------|------------|---------|----------|---------------|
| A. chinensis  | TGGAACCTTGAAATCC | CAATTC  | CAATTC     | CAATTC  | CAATTC   | CAATTC        |
| A. cordata    | CGGTAACCTTAGAATC | CAATTC  | CAATTC     | CAATTC  | CAATTC   | CAATTC        |
| A. graveolens | TGGGAACCTTAGAGT  | TCCTTTC | TCCTTTC    | TCCTTTC | TCCTTTC  | TCCTTTC       |
| D. carota     | TGGAACCTTAGAGT   | TCCTTTC | TCCTTTC    | TCCTTTC | TCCTTTC  | TCCTTTC       |
| M. domestica  | CGGTAACCTTGGAATC | CAATTC  | CAATTC     | CAATTC  | CAATTC   | CAATTC        |
| P. hybrida    | TGGAGACTTGGAATC  | CAATTC  | CAATTC     | CAATTC  | CAATTC   | CAATTC        |
| V. mungo      | GGTGAAGAGGAGAC   | CATTGTT | TTCGAAAGAC | ACTAGCA | TCCGTGGG | AGTGTGTACCTCA |

|               | 640              | 650   | 660    | 670   | 680    | 690                 |
|---------------|------------------|-------|--------|-------|--------|---------------------|
| A. chinensis  | AGCAACCACGTGTTCT | ATAA  | AACTCT | TCGAA | GAAC   | TGACCC              |
| A. cordata    | GGCAGCTGCCGTTCC  | ATAA  | AACTCT | TCGAA | GAAC   | TGACCC              |
| A. graveolens | GGCATGTGTTCTGG   | CAAT  | AACTCT | TCGAA | GAAC   | TGACCC              |
| D. carota     | AGCAGATGTTCTGG   | GATG  | AACTCT | TCGAA | GAAC   | TGACCC              |
| M. domestica  | TGCCACCAGGATTTTC | ATAA  | AACTCT | TCGAA | GAAC   | TGACCC              |
| P. hybrida    | AGCCACTGCCTTGCC  | AGTAA | AACTCT | TCGAA | GAAC   | TGACCC              |
| V. mungo      | AGCTGAGGCAGTGG   | TGTG  | AAATTT | TTTGA | GAACTA | GATCCACCCTTGTGGTTAA |

|               | 700          | 710       | 720     | 730      | 740       |
|---------------|--------------|-----------|---------|----------|-----------|
| A. chinensis  | TCTCAACTC    | CAACTT    | TGGG    | AGTTC    | CTCAACAT  |
| A. cordata    | TATAAAATCAAA | AGTTCAA   | AAAATTC | CTCAACAT | CGGTCCCTT |
| A. graveolens | TCTTAGTTC    | AAAGTTCAA | CAAGATT | CTTAAT   | CTAGGAC   |
| D. carota     | TCTTAGTTC    | AAAGTTCAA | CAAGATT | CTTAAT   | CTAGGAC   |
| M. domestica  | TCTAAAGTCCAA | AGTTCAA   | AACTCT  | CTCAAC   | CTAGGAC   |
| P. hybrida    | TCTCAAGTCCAA | AGTTCAA   | AACTCT  | CTCAAC   | CTAGGAC   |
| V. mungo      | CATGAAGTCAAA | AGTTAA    | GATTTA  | CTTAT    | GTGGT     |

|               | 750          | 760    | 770     | 780     | 790    | 800           |
|---------------|--------------|--------|---------|---------|--------|---------------|
| A. chinensis  | ACATCCATATC  | ...AAA | ...TTCC | GACGAGT | ATGGA  | TGCATCC       |
| A. cordata    | ACCACCATCATC | ...AAA | ...CTCC | GACGAA  | CACGGC | TGCATCC       |
| A. graveolens | ACCAGCATTACA | ...ATA | ...TTCC | GAGATGA | ATATGG | TGCATCC       |
| D. carota     | ACCAGCATTACA | ...ATA | ...CTCC | GAGATGA | ATATGG | TGCATCC       |
| M. domestica  | GCCACC       | GCTGCC | ...G    | CATCAGA | ..T    | GCTTGGCTTGT   |
| P. hybrida    | ACCACC       | CTCAGC | ...AAA  | CATTAC  | CAGATG | AATATGG       |
| V. mungo      | GCCACC       | CTTGC  | CTCCATC | AGACAG  | GACGAA | ACTGGTGCCTTGT |

|               | 810            | 820        | 830   | 840    | 850    | 860      |
|---------------|----------------|------------|-------|--------|--------|----------|
| A. chinensis  | GAGATCCGCTTC   | C...GTGGC  | ATAAT | TGGCTT | TGGATC | AGTACG   |
| A. cordata    | AAACCCTAAATCG  | ...GTAGC   | GATAT | TGCCCT | TGGAAC | CGTAGC   |
| A. graveolens | AAACCCTCAGTTC  | ...GTGGC   | ATAAT | TGGCTT | TGGAAC | CGTAGC   |
| D. carota     | TAAATCCTAAGTCT | ...GTGGC   | ATAAT | TGGCTT | TGGAAC | CGTAGC   |
| M. domestica  | ACAGGCTCCATCT  | CCTC       | GTGGT | TACAT  | AAAGT  | TGGGAC   |
| P. hybrida    | AGAACAGGC      | TC...GTGGC | TACAT | AAAGT  | TGGGAC | AGTGGC   |
| V. mungo      | GAAAGTGGATCA   | ...GTGGT   | GATAT | TAGT   | TTGGG  | ACGGTGTG |

|               |                                                              |     |     |     |     |     |
|---------------|--------------------------------------------------------------|-----|-----|-----|-----|-----|
|               | 870                                                          | 880 | 890 | 900 | 910 | 920 |
| A. chinensis  | TGAGGTCGTGGCAATAGCTGAAGCACTAGAAGCTAGCAGTACTCCAATTCTCTGGTCTCT |     |     |     |     |     |
| A. cordata    | TGAGCTAGTTCATTAAGCTGAGGCGCTAGAAGAAAGTGGTACTCCAATTCTCTGGTCTCT |     |     |     |     |     |
| A. graveolens | TGAGATAGCTGAATTAGCTGGAGCCCTGAGTCAAGTGGAACTCCAATTCTCTGGTCTCT  |     |     |     |     |     |
| D. carota     | TGAGATAGTGAATGGCTGAAGCCTCTGGAATCAAGTGGTACTCCAATTCTCTGGTCTCT  |     |     |     |     |     |
| M. domestica  | GGAGCAGATGGCAATAGCGGAGGCCCTGGAAGCCACCGAGCACTCTCTCTGGTCTCT    |     |     |     |     |     |
| P. hybrida    | TGAGCTAAAAGCTATGGCTGAAGCACTTGAAGAAAGTAAACTCTCTCTCTGGTCTCT    |     |     |     |     |     |
| V. mungo      | TGAGATTGTGCAAGTGGCGGAAGCGCTTGGAAGCAAGTGGTTTCCCTTTCTGGTCTCT   |     |     |     |     |     |

|               |                                                                                    |     |     |     |     |
|---------------|------------------------------------------------------------------------------------|-----|-----|-----|-----|
|               | 930                                                                                | 940 | 950 | 960 | 970 |
| A. chinensis  | TAGAGCACTTCGAAACAGTACTTACAGAAAGGATTCTTGAAGAGGAAAGCGACTA.                           |     |     |     |     |
| A. cordata    | AAAGGACAAATTTCAAATAATTAACCAAAAGGGTTTTTAGAAAGGAAATAGTAAAGT.                         |     |     |     |     |
| A. graveolens | GAAAGATCAGTTGAAACAAACATTTGCCACCAGGATTTTTGGAAAGGACATACAGAAACT.                      |     |     |     |     |
| D. carota     | GAAAGATCAGTCCAAGAAACATTTACAGAAAGGGTTTTTAGAAAGGACATAGAAAGC.                         |     |     |     |     |
| M. domestica  | CAAGGACAGCTGCAAGACACCGTCTGAAAGAGTTCTTACAAAAACATTTGCAAAAGCT.                        |     |     |     |     |
| P. hybrida    | TAAAGA C C T T T C A A A T C A T T T T C C A G A A G G T T T T T G G A A A G A C . |     |     |     |     |
| V. mungo      | GAAAGAGCATCTGAAAGGGTGTCTCTGCAAAATGGTTTTCTTGAAGAGGACGAGTAAAGT.                      |     |     |     |     |

|               |                                                                |     |      |      |      |      |
|---------------|----------------------------------------------------------------|-----|------|------|------|------|
|               | 980                                                            | 990 | 1000 | 1010 | 1020 | 1030 |
| A. chinensis  | ...GGAAAAATTTGTGCGCATGGGCACTTCAAGTATCAAGTTTGGCCCATAGTTCAATTTGG |     |      |      |      |      |
| A. cordata    | ...GGAAAAATTTGTGCGCATGGGCACTTCAAGTATCAAGTTTGGCCCATAGTTCAATTTGG |     |      |      |      |      |
| A. graveolens | ...GGAAAAATTTGTGCGCATGGGCACTTCAAGTATCAAGTTTGGCCCATAGTTCAATTTGG |     |      |      |      |      |
| D. carota     | ...GGAAAAATTTGTGCGCATGGGCACTTCAAGTATCAAGTTTGGCCCATAGTTCAATTTGG |     |      |      |      |      |
| M. domestica  | GAAAGGATGGTGTGCGCATGGGCACTTCAAGTATCAAGTTTGGCCCATAGTTCAATTTGG   |     |      |      |      |      |
| P. hybrida    | ...GGTAAATTTGTGCGCATGGGCACTTCAAGTATCAAGTTTGGCCCATAGTTCAATTTGG  |     |      |      |      |      |
| V. mungo      | ...GGTAAAGTTGTGCGCATGGGCACTTCAAGTATCAAGTTTGGCCCATAGTTCAATTTGG  |     |      |      |      |      |

|               |                                                                 |      |      |      |      |      |
|---------------|-----------------------------------------------------------------|------|------|------|------|------|
|               | 1040                                                            | 1050 | 1060 | 1070 | 1080 | 1090 |
| A. chinensis  | GGTTTTCATAACTCAATGGCGGATGGAACTCGGTGTAGAGACCATTGGCGCGGTCTGGCC    |      |      |      |      |      |
| A. cordata    | AGTTGTIATAACGCATGGCGGATGGAACTCGGTGTAGAGACCATTGGCGCGGTCTGGCC     |      |      |      |      |      |
| A. graveolens | AATTGTIATAACGCATGGGGGATGGAACTCGGTGTAGAGACCATTGGCGCGGTCTGGCC     |      |      |      |      |      |
| D. carota     | AATTGTIATAACGCATGGGGGATGGAACTCGGTGTAGAGACCATTGGCGCGGTCTGGCC     |      |      |      |      |      |
| M. domestica  | AGCCTTCCGTGTCGCAATGGCGGCTGGAACTCGATAAATGGAGACTATAGCAGGACCGGTGCC |      |      |      |      |      |
| P. hybrida    | TGTTTATAAATCAATGTGGATGGAACTCTGTTTGGAGAGTATAGCTGCTGGTCTGGCC      |      |      |      |      |      |
| V. mungo      | AGTGTITGTGACTCACTGCGGTGTAACTCGGTGTITAGAGCATGTCGAATGGAATGGCC     |      |      |      |      |      |

|               |                                                              |      |      |      |      |      |
|---------------|--------------------------------------------------------------|------|------|------|------|------|
|               | 1100                                                         | 1110 | 1120 | 1130 | 1140 | 1150 |
| A. chinensis  | AAATGATCGGTGGCCATCTTTGGGACCACTTAAACAATGGATGGTGAATAATGT       |      |      |      |      |      |
| A. cordata    | AGTGTATGTAGGCCCTTCTTCCGAGATCATCACATAAATACGTGGATGGTGAATAATGT  |      |      |      |      |      |
| A. graveolens | ACTGATCTGCAGACCTTCTTTGGAGACCATCAATAAACAATGGATGGTGAATAATGT    |      |      |      |      |      |
| D. carota     | CATCATCTGCAGACCTTCTTTGGAGATCATGCAATAAACAATGGATGGTGAATAATGT   |      |      |      |      |      |
| M. domestica  | ACTGATTTGTAGGCCATATTTTGGAGACAGAGGCTTAAATGCAAGGATGGTGAATAATGT |      |      |      |      |      |
| P. hybrida    | TGTGATTTGTAGGCCATTTTGGAGATCAATCAATGAAATGCTGGATGGTGAATAATGT   |      |      |      |      |      |
| V. mungo      | TAATGATATGAGGCCCTTCTTTGGGACCACTGGGTAACTGGAGGATGGTGAATAATGT   |      |      |      |      |      |

|               |                                                                 |      |      |      |      |      |
|---------------|-----------------------------------------------------------------|------|------|------|------|------|
|               | 1160                                                            | 1170 | 1180 | 1190 | 1200 | 1210 |
| A. chinensis  | GTTGGAAATTTGGTGTGAGAGTTGAAGGTGGGCTGTTTACAAAGAGGACCTACAAATGCGTGC |      |      |      |      |      |
| A. cordata    | ATGGAAATTTGGTGTGAGAAATTTGAAGGTGGGCTTGTACAAAGAACTGCTACTATGAATGC  |      |      |      |      |      |
| A. graveolens | ATGGAAATTTGGTGTGCAAAATTTAGTGGTGGTCTTTTACCAAGAAAGGAACTGTACACGC   |      |      |      |      |      |
| D. carota     | ATGGAAATTTGGTGTGCAAAATTTAGTGGTGGTCTTTTACCAAAAGGAACTGTCAGATGC    |      |      |      |      |      |
| M. domestica  | GTTTGAATCGGGGTAACCGTGGAGGATGGAGTTTTACCAAGGAGGGGCTGGTAAAAG       |      |      |      |      |      |
| P. hybrida    | ATGGAAATTTGGAGTGAATAATTTGAAGGAGGAGTTTTACTAAAGATGCAACAAATGCTTGC  |      |      |      |      |      |
| V. mungo      | TGGGAGATTTGGTGTGAGAGTTGAAGGTGGGCTGTTTACCAAGATGGCTGCTGAATGC      |      |      |      |      |      |

|               |                                                               |      |      |      |      |
|---------------|---------------------------------------------------------------|------|------|------|------|
|               | 1220                                                          | 1230 | 1240 | 1250 | 1260 |
| A. chinensis  | ACTCGAAGTGGT...TTTATCTCATGAAGAAGGGAA...GAAATTTGAAGGACCAAAATGG |      |      |      |      |
| A. cordata    | GCTTGAACAAGTACTTTTGTCTACAAAGAAAGGGAA...GAAATTTGAAGGACCAAAATC  |      |      |      |      |
| A. graveolens | CCTTGAACAAGT...TTTGTCTCAAGAAAGGGAA...AGAACTCAGAGACCAAAATC     |      |      |      |      |
| D. carota     | CCTTGAACAAGT...TTTGTCTCAAGAAAGGGAA...AGAACTCAGAGACCAAAATC     |      |      |      |      |
| M. domestica  | CTTGGAGTGGT...TTTGTCTCAAGAAAGGGAA...GAAATTTAGAGACCAAAATATAA   |      |      |      |      |
| P. hybrida    | ACTTGAAGTGGT...TTTATCTCAAAAGGAAAGGAA...TACAGAAATGAAACAAATGG   |      |      |      |      |
| V. mungo      | CTTGAAGTGGT...TTTGTCTGAGGAAAGAGGTTAA...TCTCATGAAAGAAATGCTGT   |      |      |      |      |

|                      | 1270                                                          | 1280 | 1290 | 1300 | 1310 | 1320 |
|----------------------|---------------------------------------------------------------|------|------|------|------|------|
| <i>A. chinensis</i>  | ACACTTAAAGGAGCTTCTCTAAAGGCTGTGGACCAAAGGAGCTCATCTCAAAACTT      |      |      |      |      |      |
| <i>A. cordata</i>    | AGTGTTAAGGAGCTTCTCTAAAGGCTGTGGACCTAATGGAGCTCATCTCAAAACTT      |      |      |      |      |      |
| <i>A. graveolens</i> | ATTGCTGAAGGATCTCGCATTCAGGCTGTGGACCTAATGGTAGCTCATCTCAAAACTT    |      |      |      |      |      |
| <i>D. carota</i>     | ATTACTCAAGGATCTTGCATTCAGGCAAGTGGACCTAATGGTAGCTCATCTCAAAACTT   |      |      |      |      |      |
| <i>M. domestica</i>  | GAGGGTCAAACAACCTGGCAGTAGAGGCGGTGGACCACAAAGGAGCTCCACTCGGAACCTT |      |      |      |      |      |
| <i>P. hybrida</i>    | GATGTATAAGGAGCTTCTCTAAAGGCTGTGGACCAAAGTGGAGCTCTGCTGAAACTT     |      |      |      |      |      |
| <i>V. mungo</i>      | CAAAGTGAAGAGACAGTCTCTAAAGTGCAGCTGGAGCACAAAGGTAAGCAGCACAAGATTT |      |      |      |      |      |

|                      | 1330     | 1340   | 1350  | 1360  |        |                                       |
|----------------------|----------|--------|-------|-------|--------|---------------------------------------|
| <i>A. chinensis</i>  | CAA      | TAATT  | TGCTT | GAGGT | AATAAC | CAGG.CCACAACCTTTGA.....               |
| <i>A. cordata</i>    | TAA      | ACGCC  | TACTA | GAGT  | GATTAC | AAAC.TTAATTTTGTGGCATATGCACCTAGCTAGCT  |
| <i>A. graveolens</i> | TGAGGAGC | TACTGA | AAGT  | GATTA | CAAC   | .GTATGTACCAAATTAG.....                |
| <i>D. carota</i>     | TACAGAGC | TAGTAA | AAGT  | GAT   | TGCTGT | .CTGA.....                            |
| <i>M. domestica</i>  | CAAA     | TATCGC | TGTGG | ACAT  | CGTAT  | CAGGATCCAATTATCAAGTA..TAGTACGGGGACCAT |
| <i>P. hybrida</i>    | CAA      | GAAAT  | TGGTT | GATAT | TATCA  | CCTC.TTGCAATTAATAATTTTACTTGAAGAGATT   |
| <i>V. mungo</i>      | CAA      | CACCTT | TGGT  | GACT  | TGGTT  | CTAGATCTTAATTTATGGCCCTTTTGTCTAGTGATAT |

|                      |                                                             |
|----------------------|-------------------------------------------------------------|
| <i>A. chinensis</i>  | .....                                                       |
| <i>A. cordata</i>    | TGTTGATGAATGAAGTTACCTTTTGTATTAAAAA.....                     |
| <i>A. graveolens</i> | .....                                                       |
| <i>D. carota</i>     | .....                                                       |
| <i>M. domestica</i>  | AAATATGTAGCACT.....                                         |
| <i>P. hybrida</i>    | AATGATTTACTATCTGTTTGAATAATAAATTCACCTTTAATTT.....            |
| <i>V. mungo</i>      | TGATATATATCGCTGCCGTGAGAAATGCAGTTTATGACCATGCAAGTGATGTAATTTTT |

|                      |                                                              |
|----------------------|--------------------------------------------------------------|
| <i>A. chinensis</i>  | .....                                                        |
| <i>A. cordata</i>    | .....                                                        |
| <i>A. graveolens</i> | .....                                                        |
| <i>D. carota</i>     | .....                                                        |
| <i>M. domestica</i>  | .....                                                        |
| <i>P. hybrida</i>    | .....                                                        |
| <i>V. mungo</i>      | TTACATGTTTTCTCTTGTGGAGGTGAATAATAAGATCATTTGTCTCATCTTTCAITGGTG |

|                      |                                               |
|----------------------|-----------------------------------------------|
| <i>A. chinensis</i>  | .....                                         |
| <i>A. cordata</i>    | .....                                         |
| <i>A. graveolens</i> | .....                                         |
| <i>D. carota</i>     | .....                                         |
| <i>M. domestica</i>  | .....                                         |
| <i>P. hybrida</i>    | .....                                         |
| <i>V. mungo</i>      | GGAGTAGTTGACCAGAAATAAAAAGTGGCAAAAGTTGGAGACACC |

Figure S1 Alignment of deduced amino acid sequences of galactosyltransferases from *Actinidia chinensis* (Accession No. GU079683), *Aralia cordata* (Accession No. AB103471), *Apium graveolens* (Accession No. MG725374), *Daucus carota* (Accession No. KP319022), *Malus domestica* (Accession No. NC041789), *Petunia hybrida* (Accession No. AF165148) and *Vigna mungo* (Accession No. AB009370), respectively.
